# Supplementary material for: Common Variants in a Novel Gene, FONG on Chromosome 2q33.1 Confer Risk of Osteoporosis in Japanese
Source: PLoS One. 2011 May 6;6(5):e19641. doi: 10.1371/journal.pone.0019641 (PMC3089633; doi:10.1371/journal.pone.0019641)
Supplement: Table S2 — Basal characteristics of the subjects. (XLS) [file pone.0019641.s004.xls]

## Sheet: TableS2
	Table S2. Basal characteristics of the subjects.
	Population	Group	Number	Sex	Age*	BMI*	BMD* (g/cm2)
			of subject	(% female)	(year)	(kg/m2)	Lumber spine	Femoral neck
	Discovery 1	Case	190	100	77.0±4.9	21.9±3.3	0.69±0.16	0.57±0.09
		Control	1557	52.2	58.1±13.3	23.9±3.7	ND	ND
	Discovery 2	Case	526	100	76.9±5.4	21.9 ± 3.8	0.68±0.15	0.60±0.13
		Control	1537	30.1	59.8±17.2	22.6±3.5	ND	ND
	Replication 1	Case	1326	100	73.1±8.1	21.6±3.3	0.67±0.19	0.59±0.12
		Control	1292	100	71.4±7.0	24.0±3.7	ND	ND
	Replication 2	Case	240	100	70.4±7.5	21.2±2.9	0.68±0.08	0.56±0.04
		Control	285	100	66.2±7.9	23.5±3.0	1.09±0.13	0.84±0.05
	*Data are expressed as mean ± standard deviation.
	BMI: body mass index, BMD: bone mineral density, ND: not determined.
